1 SARS-CoV-2 infecting the inner ear results in potential hearing damage at the early stage or

2 prognosis of COVID-19 in rodents

3 Xia Xue<sup>1</sup>, Yongan Tian<sup>2</sup>, Mingsan Miao<sup>3</sup>, Jianyao Wang<sup>5</sup>, Wenxue Tang<sup>1,4</sup>, Yaohe Wang<sup>5,6</sup>, Jianbo

4 Liu<sup>4</sup>, Hongen Xu<sup>1,4#</sup>, Jinxin Miao<sup>3,5#</sup>

5 **#Joint corresponding authors**

6 1. Precision Medicine Center of Zhengzhou University, Academy of Medical Sciences, Zhengzhou

7 University, Zhengzhou, Henan 450000, P.R. China.

8 2. BGI College & Henan Institute of Medical and Pharmaceutical Sciences, Zhengzhou University,

9 Daxuebei Road No.40, Zhengzhou 450052, China.

10 3. Academy of Chinese Medicine Science, Henan University of Chinese Medicine, Zhengzhou,

11 Henan 450000, P.R. China.

12 4. The Second Affiliated Hospital of Zhengzhou University, Zhengzhou, Henan 450000, P.R.

13 China.

14 5. National Center for International Research in Cell and Gene Therapy, School of Basic Medical

15 Sciences, Academy of Medical Sciences, Zhengzhou University, China, Zhengzhou, Henan

16 450000, P.R. China.

17 6. Centre for Biomarkers & Biotherapeutics, Barts Cancer Institute, Queen Mary University of

18 London, London EC1M 6BQ, UK

19 **# Corresponding authors:**

20 Dr. Jinxin Miao: [jinxin.miao@yahoo.com](mailto:jinxin.miao@yahoo.com)

21 Dr. Hongen Xu: [hongen\\_xu@zzu.edu.cn](mailto:hongen_xu@zzu.edu.cn)

22

23

24

## 25 **Abstract**

### 26 **Objectives:**

27 In order to find out the association between the sensorineural hearing loss and COVID-19, we  
28 detected the expression ACE2 and TMPRSS2 in the mouse the hamster.

### 29 **Design :**

30 Using the public data from NCBI and GISAID, we assessed the expression of ACE2 and  
31 TMPRSS2 at the transcriptomic, DNA, and protein levels of ACE2 in the brain, inner ear, and  
32 muscle from the golden Syrian hamster (*Mesocricetus auratus*) and mouse (*Mus musculus*).

### 33 **Results:**

34 We identified ACE2 and TMPRSS2 expressed at different level in the inner ear and brain at DNA  
35 and transcriptomic levels of both mouse and the hamster. The protein expression shows a similar  
36 pattern of the brain and inner ear, while the expression of ACE2 from the inner ear was relatively  
37 higher than it from the muscle.

### 38 **Conclusion:**

39 SARS-CoV-2 could infect the hearing system potentially and SSNHL could be a characteristic to  
40 detect asymptomatic patients of COVID-19.

41 **Keywords:** SSNHL, COVID-19, small animal models, inner ear

## 42 **Introduction**

43 Hundred thousand death caused by a coronavirus (SARS-CoV-2) disease 2019 (COVID-19)

44 within a few months highlights the importance of early diagnosis of COVID-19. Meanwhile, the  
45 increasing trend of the confirmed cases draws more attention to the treatment and prognosis of  
46 COVID-19 patients. Some recent clinical studies observed some un-specific symptoms of  
47 COVID-19, including headache, diarrhea, and sudden sensorineural hearing loss (SSNHL) (Kilic  
48 et al. 2020; Harenberg, Jonas, and Trecca 2020); one case has reported profound sensorineural  
49 hearing damage in a 60-year-old COVID-19 patient (Degen, Lenarz, and Willenborg 2020). To our  
50 acknowledge, the ACE2 receptor is a key for SARS-Cov-2 entry human cells while TMPRSS2 is  
51 highly involved in virus replication, the co-expression of which two could mainly determine the  
52 level of damage to the hosts. It has been previously investigated that the expression of ACE2 and  
53 TMPRSS2 was high in the intestine and kidney of humans compared to the brain and lung.  
54 Although several clinical studies confirmed the most common symptoms of COVID-19, SSNHL  
55 were also found but not draw much attention due to they are similarity to the symptoms of the flu  
56 or cold. SARS-CoV-2 could infect many organs, including the hearing center, which could invade  
57 the cochlear nerve and lead to SSNHL and cause hearing damage after treatment of the patients  
58 with COVID-19. We have already demonstrated the golden hamster (*Mesocricetus auratus*) could  
59 be a better small animal model for COVID-19 compared to a mouse (*Mus musculus*) for  
60 understanding the efficiency and possibility of SARS-CoV-2 attacking human cells with certain or  
61 potential consequences.

## 62 **Methods**

63 The procedures in this study involving animals were reviewed and approved by the Animal  
64 Experimentation Ethics Committee of the Henan University of Chinese Medicine (No.  
65 DWLL202001301). Raw RNA-seq data of transcriptomes were collected from NCBI. The coding

66 sequence of *ACE2* and *TMPRSS2* was aligned with Clustral Omega (V1.2.3) and reconstructed  
67 phylogeny, calculated distance by using MEGA v5.2. 1000 maximum number of iterations were  
68 applied with Kimura two factor correction method for genetic distance prediction. Cufflinks  
69 v2.2.1 with Bowtie2 (Langmead and Salzberg 2012) were used for expression analysis of  
70 transcriptomes from different tissues in humans, mice, and hamsters. We next ran quantitative  
71 real-time PCR (qRT-PCR) and western blot on seven tissues from both mouse and the hamster to  
72 quantitate the expression of *ACE2* and *TMPRSS2*. All experimental details are included in the  
73 supplementary file.

## 74 **Results**

75 Gene *ACE2* and *TMPRSS2* of the mouse and hamster are over 80% similarity to humans (figure  
76 1A). We found *ACE2* expressed higher in the heart of humans and slightly higher in the brain of  
77 both human and mouse, while *TMPRSS2* shows high expression in the lungs of both human and  
78 mouse but lower in the brain (figure 1B). In addition, we found a similar pattern of the hamster  
79 and human; Both *ACE2* and *TMPRSS2* were highly expressed in the spleen and relatively high in  
80 the liver, but not in the brain (figure 1C). The mRNA expression of *ACE2* shows high in the inner  
81 ear of both the mouse and hamster, while *TMPRSS2* was much higher expressed in the lung  
82 compared to the inner ear. However, both genes showed lower expression levels in the brains of  
83 these two animal models. The protein expression shows a similar pattern of the brain and inner ear,  
84 while the expression of *ACE2* from the inner ear was relatively higher than it from the muscle  
85 (figure 1D, E, F).

## 86 **Discussion**

87 We hypothesized that SARS-CoV-2 might infect the inner ear by binding to *ACE2*, which is the  
88 main reason causing sensorineural hearing loss by pathogens invasion. Some studies found *ACE2*,  
89 *TMPRSS2*, and *Furin* expressed in the middle ear of a mouse, promising in our data from the  
90 present study (Uranaka et al. 2020). Since the transcriptome data from the inner ear specifically  
91 has not been available on NCBI, the brain was chosen as an alternative tissue (Zhang et al. 2020).  
92 We found *ACE2* did express in the inner ear of both the mouse and the hamster, although the  
93 expression level was different compared to *ACE2* expressed in the lung. *TMPRSS2* shows high  
94 expression in the lungs compared to it in the inner ear, which might be the reason the symptoms of  
95 COVID-19 in the respiratory is more severe in the inner ear. More sophisticated work is required  
96 to understand the molecular mechanism of SARS-CoV-2 infecting the inner ear and causing  
97 sensorineural hearing loss.

## 98 **Author Contribution**

99 Dr. Xue, Dr. Xu, and Dr. Miao designed all the experiments; Dr. Xue did the analysis of transcripts;  
100 Dr. Miao and Mrs. Wang finished the qRT-PCR and Western blot; Dr. Tang, Dr. Miao, and Dr.  
101 Wang revised the manuscript. All authors are involved in writing and editing this manuscript.

## 102 **Conflict of Interest Disclosure**

103 None report

## 104 **Funding**

105 This study was supported by the Collaborative Innovation Project of Zhengzhou (Zhengzhou  
106 University) (Grant no. 18XTZX12004), the Ph.D. research startup foundation of Henan University

107 of Chinese Medicine (Grant no.RSBSJJ2018-36), Henan Province emergency (Grant no.  
108 201100312300), Zhengzhou emergency project (Grant no. ZZKJ2020604), and the Department of  
109 Science and Technology of Henan Province (Grant no. 201100312100).

## 110 **Figure Legend**

111 **Figure 1.** The expression level of *ACE2* and *TMPRSS2* at transcriptomic, DNA, and protein level.  
112 A: the phylogenetic of *ACE2* and *TMPRSS2* from human, mouse then the hamster; B: The  
113 transcriptome comparison of *ACE2* and *TMPRSS2* from different tissues of human and the mouse;  
114 C: The transcriptome comparison of *ACE2* and *TMPRSS2* from different tissues of human, the  
115 hamster, and the mouse; D & E: The mRNA expression profile of *ACE2* and *TMPRSS2* in golden  
116 Syrian hamster and mouse tissues. Housekeeping gene *Actb* was used for normalization. Relative  
117 expression levels ( $\Delta\Delta Ct$ ) of different tissues were compared with that of lung tissue. \*  $P < 0.05$ ,  
118 \*\*  $P < 0.01$ , \*\*\*  $P < 0.001$ . F: Expression of *ACE2* protein in different tissues of the golden  
119 Syrian hamster and mouse. Li: Liver, H: Heart, S: Spleen, L: Lung, B: Brain, IE: Inner ear, M:  
120 muscle.

## 121 **Reference**

122 Degen C, Lenarz T, Willenborg K. (2020) Acute Profound Sensorineural Hearing Loss After COVID-19  
123 Pneumonia. *Mayo Clin Proc* 95: 1801-1803.  
124 Harenberg J, Jonas JB, Trecca EMC. (2020) A Liaison between Sudden Sensorineural Hearing Loss and  
125 SARS-CoV-2 Infection. *Thromb Haemost.*  
126 Kilic O, Kalcioğlu MT, Cag Y, Tuysuz O, Pektaş E, Caskurlu H, Cetin F. (2020) Could sudden sensorineural  
127 hearing loss be the sole manifestation of COVID-19? An investigation into SARS-COV-2 in the  
128 etiology of sudden sensorineural hearing loss. *Int J Infect Dis* 97: 208-211.  
129 Langmead B, Salzberg SL. (2012) Fast gapped-read alignment with Bowtie 2. *Nat Methods* 9: 357-U54.  
130 Uranaka T, Kashio A, Ueha R, Sato T, Bing H, Ying G, Kinoshita M, Kondo K, Yamasoba T. (2020)  
131 Expression of *Ace2*, *Tmprss2*, and *Furin* in mouse ear tissue. *bioRxiv*: 2020.06.23.164335.  
132 Zhang JJ, Dong X, Cao YY, Yuan YD, Yang YB, Yan YQ, Akdis CA, Gao YD. (2020) Clinical characteristics of  
133 140 patients infected with SARS-CoV-2 in Wuhan, China. *Allergy*.



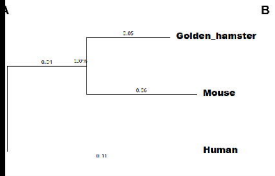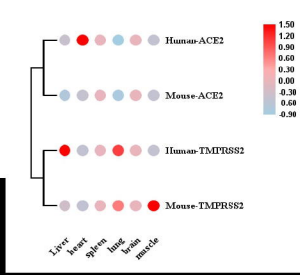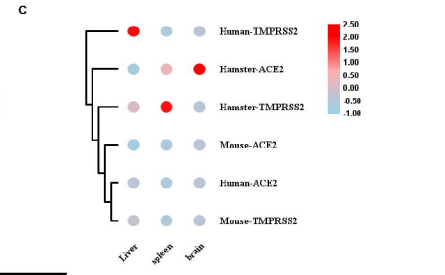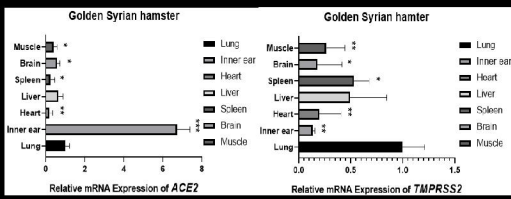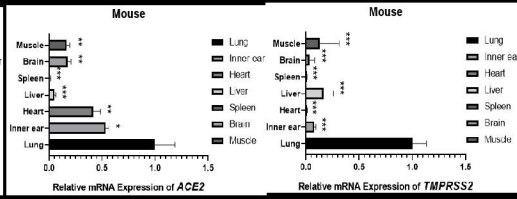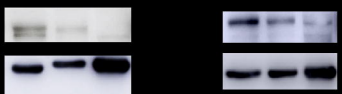

Source: https://biorxiv.org/content/10.1101/2020.12.23.423942v1.full.pdf
